# Supplementary material
Source: publisher site journal article supplement (https://static.cambridge.org/content/id/urn:cambridge.org:id:article:S1041610220000769/resource/name/S1041610220000769supp001.docx)
Supplement: Supplementary file 1 [file S1041610220000769supp001.docx]

Supplementary material: APPENDIX A1

| Variable |  | Model 1 | Model 2 | Model 3 | Model 4 | Model 5 | Model 6 |
| --- | --- | --- | --- | --- | --- | --- | --- |
| Independent Variable: Care recipient profile | | | | | | | |
| Dementia | Yes | 2.101*** | 1.775*** | 1.730*** | 1.618*** | 1.364** | 1.227 |
| Age | Age |  | 1.001 | 0.995 | 1.000 | 1.007 | 1.010 |
| Gender | Male |  | 1.163* | 1.181 | 1.196 | 1.220* | 1.026 |
| Dependency level | Medium |  | 1.987*** | 1.898*** | 1.638*** | 1.631*** | 1.671*** |
| High |  | 2.901*** | 2.949*** | 2.350*** | 2.202*** | 2.362*** |
| Independent Variable: Family carer profile | | | | | | | |
| Age | Age |  |  | 1.000 | 1.006 | 1.009 | 1.002 |
| Gender | Male |  |  | 0.724*** | 0.715*** | 0.700*** | 0.748** |
| Marital status | Married/Civil Partnership |  |  | 1.325** | 1.655*** | 1.816*** | 1.669*** |
| Living with a partner |  |  | 2.682*** | 2.352*** | 2.734*** | 2.487*** |
| Divorced/  Separated |  |  | 1.854*** | 1.830*** | 1.642** | 1.844*** |
| Widowed |  |  | 1.550 | 2.035** | 2.236*** | 2.032** |
| Education | Junior Certificate |  |  | 0.993 | 1.001 | 1.078 | 1.072 |
| Leaving Certificate |  |  | 1.015 | 1.088 | 1.324* | 1.270 |
| Vocational/  Technical Qualifications |  |  | 1.342* | 1.441** | 1.540** | 1.428** |
| Third-Level Non-Degree |  |  | 1.774*** | 1.667*** | 1.865*** | 1.732*** |
| Third-level Degree or Higher |  |  | 2.255*** | 2.893*** | 3.330*** | 3.323*** |
| Residence | Urban |  |  | 1.189* | 1.141 | 1.088 | 1.119* |
| Independent Variable: Context of caring | | | | | | | |
| Relationship to older person | Adult child |  |  | 1.409* | 1.486* | 1.885*** | 1.695** |
| Relative |  |  | 1.105 | 1.303 | 1.559* | 1.300* |
| Non-relative |  |  | .8731 | 1.358 | 1.467 | 1.247 |
| Care hours per week | 20-39 hours |  |  |  | 0.997 | 1.021 | 1.009 |
| 40-59 hours |  |  |  | 1.200 | 1.132 | 1.249 |
| 60-80 hours |  |  |  | 1.132 | 1.116 | 1.344 |
| 80+ hours |  |  |  | 1.488 | 1.468 | 2.088* |
| Duration of caring | Duration of caring in months |  |  |  | 1.001* | 1.001 | 1.001* |
| Co-residence | Yes |  |  |  | 1.282* | 1.347** | 0.991 |
| Perceived support | Fair |  |  |  | 0.305*** | 0.354*** | 0.440*** |
| Good |  |  |  | 0.076*** | 0.098*** | 0.147*** |
| Psychological abuse | Potentially harmful |  |  |  |  | 3.275*** | 2.375*** |
| Physical Abuse | Potentially harmful |  |  |  |  | 2.202*** | 1.783** |
| Quality of relationship | Fair |  |  |  |  |  | 0.463* |
| Good |  |  |  |  |  | 0.144*** |
| Excellent |  |  |  |  |  | 0.038*** |
|  | | | | | | | |
| Observations (n) | | 1,992 | 1,753 | 1,675 | 1,572 | 1,546 | 1,535 |
| Goodness of fit | | | | | | | |
| AIC | | 4926.35 | 4305.47 | 4074.84 | 3445.66 | 3448.38 | 3059.46 |
